# Supplementary material
Source: Springer Nature journal article supplement (https://www.springermedizin.de/resource/supplementary/12916_2011_524_MOESM7_ESM.pdf/9598066)
Supplement: MOESM7 [file 9598066]

Broad database searches for primary prevention intervention trials in cardiovascular disease were conducted in MEDLINE, EMBASE, AMED and CENTRAL, and yielded 12,459 titles and abstracts

11,701 deemed not relevant or clearly not fulfilling the inclusion criteria

758 full text articles assessed

733 deemed not relevant (for drug-drug comparisons of antihypertensive medication) or in other ways not fulfilling the inclusion criteria

25 studies included in this review
